# Supplementary material for: Targeted killing of prostate cancer cells using antibody–drug conjugated carbon nanohorns
Source: Royal Society of Chemistry journal article supplement (doi:10.1039/c7tb02464a), 2017-01-01
Supplement: c7tb02464a1.pdf [file c7tb02464a1.pdf]

## SUPPORTING INFORMATION

### Targeted Killing of Prostate Cancer Cells using Antibody-Drug conjugated Carbon Nanohorns

#### Authors

María Isabel Lucío,<sup>a,b,c</sup> Roberta Opri,<sup>d</sup> Marcella Pinto,<sup>d</sup> Alessia Scarsi,<sup>e</sup> Jose L. G. Fierro,<sup>f</sup> Moreno Meneghetti,<sup>e,\*</sup> Giulio Fracasso,<sup>d,\*</sup> Maurizio Prato,<sup>c,g,h</sup> Ester Vázquez,<sup>a,b</sup> María Antonia Herrero,<sup>a,b,\*</sup>

#### Affiliations

- a.* Departamento de Química Orgánica, Inorgánica y Bioquímica, Facultad de Ciencias y Tecnologías Químicas, Universidad de Castilla-La Mancha, Campus Universitario, 13071 Ciudad Real, Spain. E-mail: MariaAntonia.Herrero@uclm.es
- b.* IRICA Universidad de Castilla-La Mancha. Campus Universitario, 13071 Ciudad Real, Spain.
- c.* Department of Chemical and Pharmaceutical Sciences, University of Trieste, 34127 Trieste, Italy.
- d.* Department of Medicine, University of Verona, Policlinico GB Rossi, Piazzale L.A. Scuro 10, 37134 Verona Italy. Email: giulio.fracasso@univr.it
- e.* Department of Chemical Sciences, University of Padova, Via Marzolo, 1, I-35131, Padova, Italy. Email: moreno.meneghetti@unipd.it
- f.* Instituto de Catálisis y Petroleoquímica, CSIC, Cantoblanco, 28049, Madrid, Spain.
- g.* CIC BiomaGUNE, Parque Tecnológico de San Sebastián, Paseo Miramón, 182, 20009 San Sebastián (Guipúzcoa), Spain.
- h.* Basque Foundation for Science, Ikerbasque, Bilbao 48013, Spain

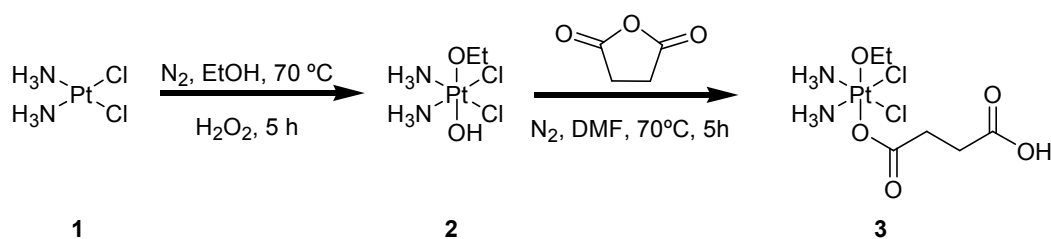

Figure S1. Synthesis of prodrug 3.

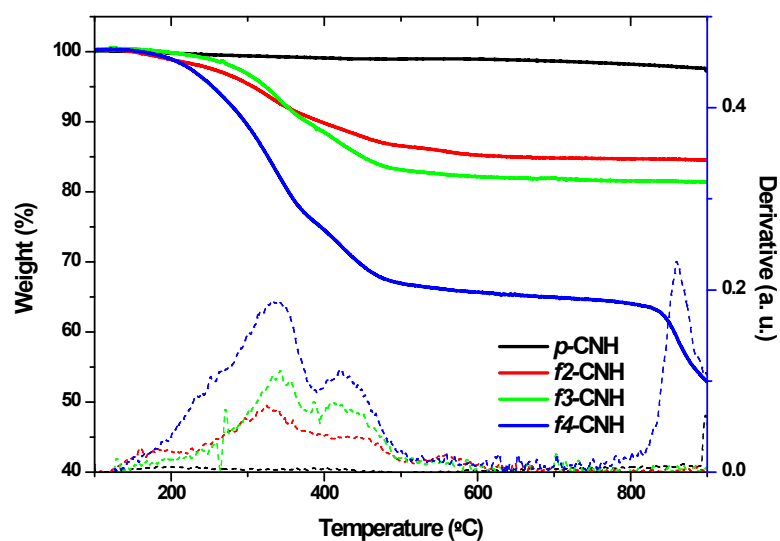

**Figure S2.** Thermogravimetric analyses of samples **f2-CNH**, **f3-CNH** and **f4-CNH** versus **p-CNH**. The dashed lines show the 1<sup>st</sup> derivative of the corresponding sample (same colour of the curve): **f2-CNH** shows two peaks at 325 and 400 °C; **f3-CNH** shows two peaks at 345 and 417 °C and **f4-CNH** shows three peaks at 335, 422 and 861 °C.

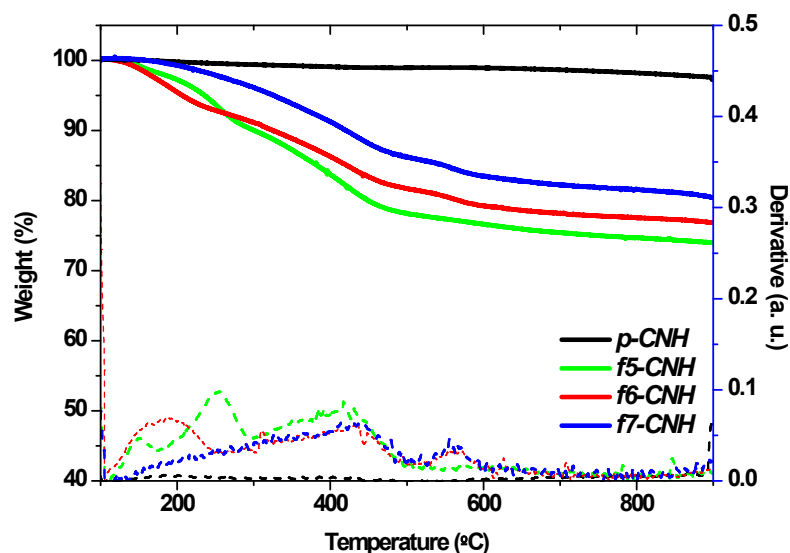

**Figure S3.** Thermogravimetric analyses of **f5-CNH**, **f6-CNH** and **f7-CNH** versus **p-CNH**. The dashed lines show the 1<sup>st</sup> derivative of the corresponding sample (same colour of the curve): **f5-CNH** shows three peaks at 150, 253 and 417 °C; **f6-CNH** shows four peaks at 190, 310, 438 and 556 °C and **f7-CNH** shows two peaks at 430 and 556 °C.

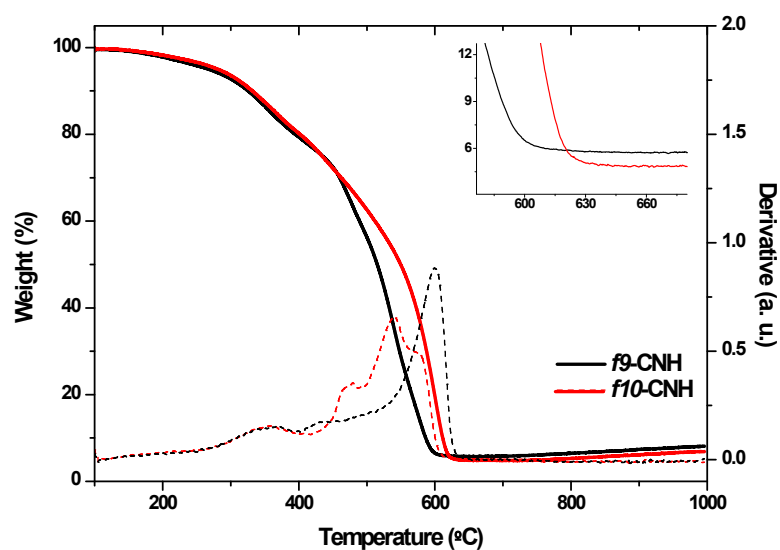

**Figure S4.** Thermogravimetric analysis under air of **f9-CNH** and **f10-CNH**. The inset shows the enlargement of the TGA in the point of finished oxidation. The increment in the quantity of residue is due to the presence of platinum in sample **f10-CNH**. The dashed lines show the 1<sup>st</sup> derivative of the corresponding sample (same colour of the curve): **f9-CNH** shows three peaks at 365, 430 and 600 °C and **f10-CNH** shows four peaks at 356, 480, 540 and 575 °C.

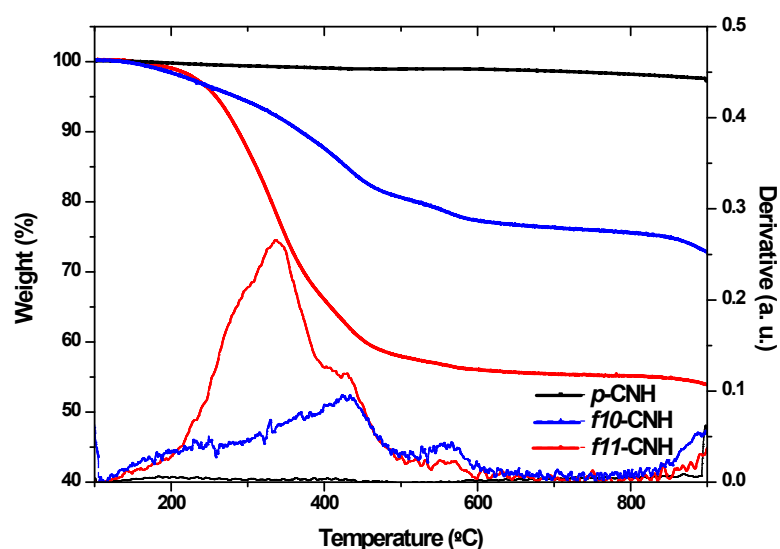

**Figure S5.** Thermogravimetric analysis of **f11-CNH** versus **f10-CNH** and **p-CNH**. The dashed lines show the 1<sup>st</sup> derivative of the corresponding sample (same colour of the curve): **f10-CNH** shows two peaks at 430 and 560 °C and **f11-CNH** shows three peaks at 335, 430 and 565 °C.

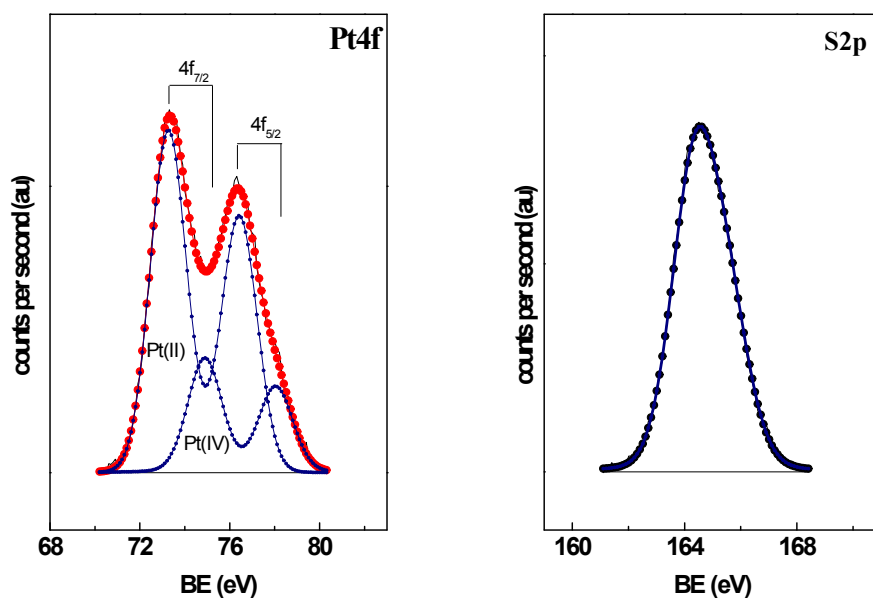

**Figure S6.** Pt4f and S2p XPS spectra of *f11*-CNH.

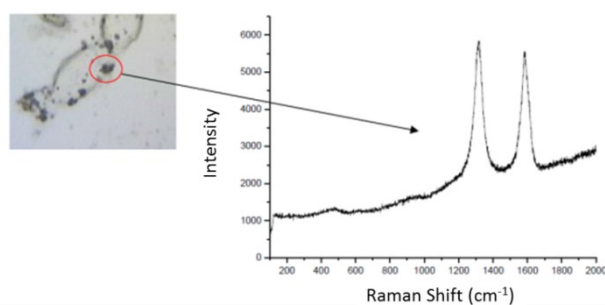

**Figure S7.** A typical Raman spectrum of CNHs at 633 nm acquired on PC-3-PSMA, PSMA<sup>+</sup> cells, incubated with *f11*-CNH. The two bands can be identified as the D and G band at 1320 and 1600 cm<sup>-1</sup>, respectively. The spectrum was recorded exciting with 1 mW, using a 20x objective and averaging for 10 s.

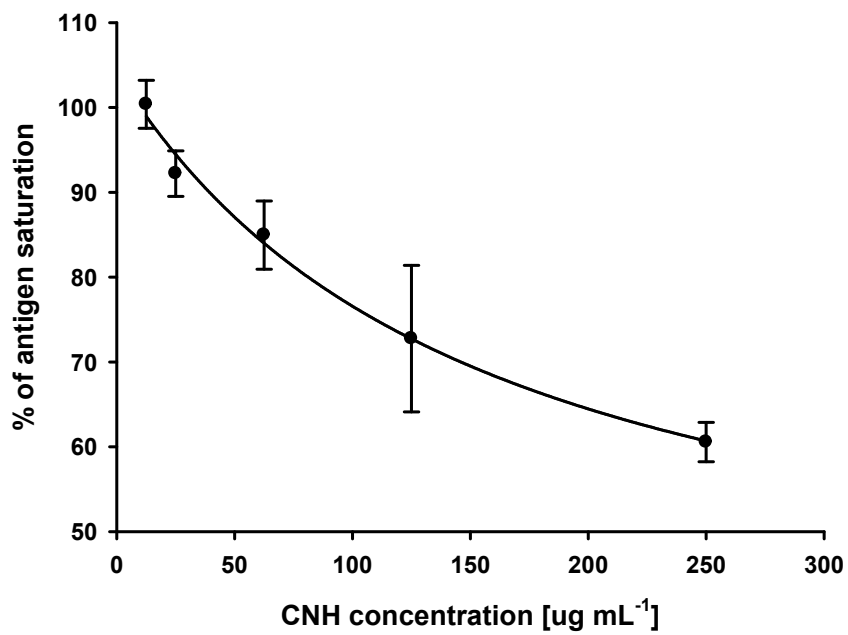

**Figure S8.** Specificity of **f11-CNH** hybrid binding on PC-3-PSMA cells. Competition between D2B-biotin Ab and **f11-CNH** hybrid for the binding to PSMA antigen sites. Mean  $\pm$  SD data of three separate experiments.

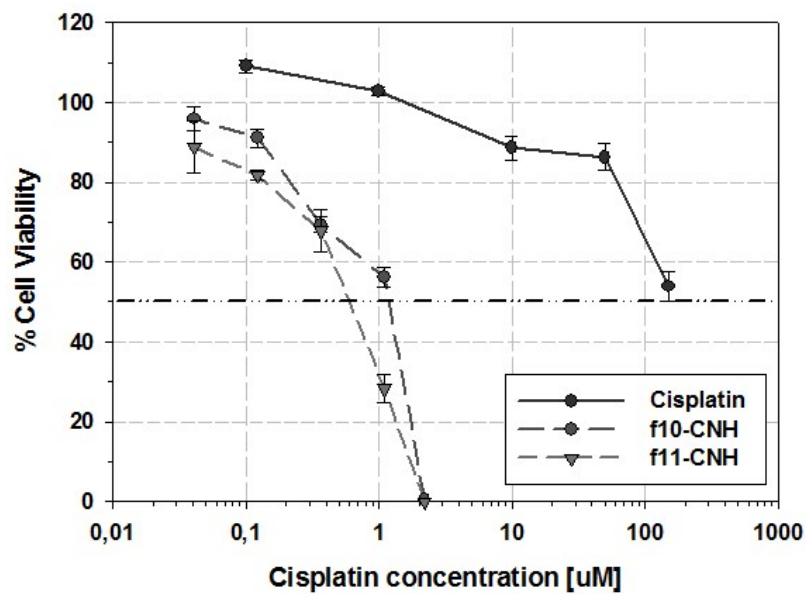

**Figure S9.** 24 h viability assay on PC-3-PSMA cells treated with cisplatin, **f10-CNH** and **f11-CNH**. Mean  $\pm$  SD of three separate experiments.

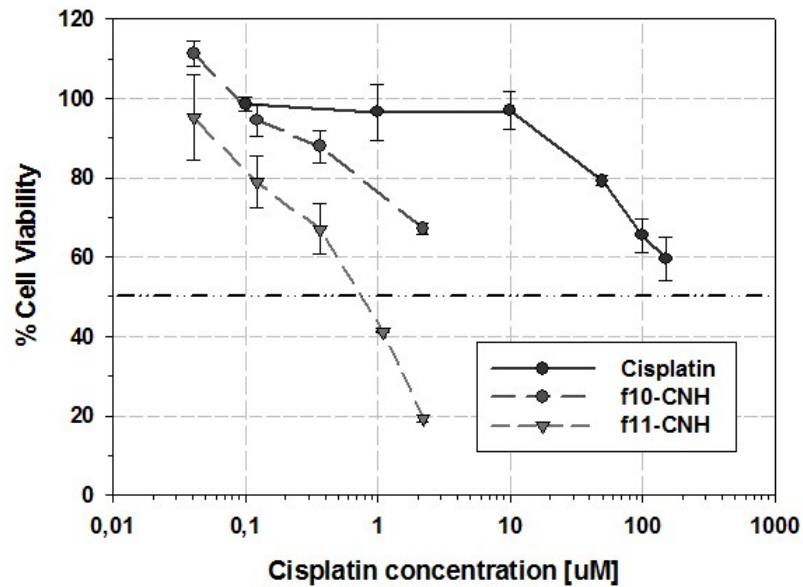

**Figure S10.** 24 h viability assay on PC-3-PSMA cells treated with cisplatin, **f10-CNH** and **f11-CNH** after a preincubation step of CNHs with BSA. Mean  $\pm$  SD data of three separate experiments.

| Table S1.                |               |                |
|--------------------------|---------------|----------------|
| f11-CNH $\mu\text{g/ml}$ | Binding       | Uptake         |
| 125                      | 5.6 $\pm$ 0.1 | 16.3 $\pm$ 1.4 |
| 250                      | 6.9 $\pm$ 0.2 | 23.0 $\pm$ 2.3 |

**Table S1.** Evaluation of binding and uptake of **f11-CNH** on LNCaP, PSMA<sup>+</sup>, cells after incubation for 1 h 30 min at 37°C. MFI values obtained by flow cytometry were normalized to obtain the fluorescent signal gain with respect to the signal of the cells incubated with the secondary antibody FITC- labelled alone (i.e. MFI sample/MFI Gam-FITC; see Experimental Section for more details). Mean  $\pm$  SD data of three separate experiments.

| Table S2.                |                |               |
|--------------------------|----------------|---------------|
| f11-CNH $\mu\text{g/ml}$ | Binding        | Uptake        |
| 125                      | 1.0 $\pm$ 0.1  | 1.4 $\pm$ 0.2 |
| 250                      | 1.2 $\pm$ 0.04 | 1.5 $\pm$ 0.2 |

**Table S2.** Evaluation of binding and uptake of **f11-CNH** on PC3- WT, PSMA<sup>+</sup> cells after incubation for 1 h 30 min at 37°C. MFI values obtained by flow cytometry were normalized to obtain the fluorescent signal gain with respect to the signal of the cells incubated with the secondary antibody FITC- labelled alone (i.e. MFI sample/MFI Gam-FITC; see Experimental Section for more details). Mean  $\pm$  SD data of three separate experiments.
